# Electrophysiological measures of visual suppression

Daniel H. Baker<sup>1\*</sup>, Greta Vilidaite<sup>2</sup>, Alex R. Wade<sup>1</sup>

**1** Department of Psychology and York Biomedical Research Institute, University of York, York, United Kingdom

**2** School of Psychology, University of Southampton, Southampton, United Kingdom

\* Corresponding author: [daniel.baker@york.ac.uk](mailto:daniel.baker@york.ac.uk)

## Abstract

In the early visual system, suppression occurs between neurons representing different stimulus properties. This includes features such as orientation (cross-orientation suppression), eye-of-origin (interocular suppression) and spatial location (surround suppression), which are thought to involve distinct anatomical pathways. We asked if these separate routes to suppression can be differentiated by their pattern of gain control on the contrast response function measured in human participants using steady-state electroencephalography. Changes in contrast gain shift the contrast response function laterally, whereas changes in response gain scale the function vertically. We used a Bayesian hierarchical model to summarise the evidence for each type of gain control. A computational meta-analysis of 16 previous studies found the most evidence for contrast gain effects with overlaid masks, but no clear evidence favouring either response gain or contrast gain for other mask types. We then conducted two new experiments, comparing suppression from four mask types (monocular and dichoptic overlay masks, and aligned and orthogonal surround masks) on responses to sine wave grating patches flickering at 5Hz. At the occipital pole, there was strong evidence for contrast gain effects in all four mask types at the first harmonic frequency (5Hz). Suppression generally became stronger at more lateral electrode sites, but there was little evidence of response gain effects. At the second harmonic frequency (10Hz) suppression was stronger overall, and involved both contrast and response gain effects. Although suppression from different mask types involves distinct anatomical pathways, gain control processes appear to serve a common purpose, which we suggest might be to suppress less reliable inputs.

## Introduction

Suppression is a fundamental component of the nervous system, and is critically important for modulating neural firing [1]. Without suppression, neural activity would be too metabolically expensive, and uncontrolled excitation might lead to seizures. In the visual system, neurons responsive to a spatially localised narrowband target stimulus are suppressed by nearby neurons that differ in their tuning [2]. This tuning can involve different orientations (cross-orientation suppression), different spatial locations (lateral, or surround suppression), and different eye-of-origin (interocular suppression). Suppression is typically studied using a masking paradigm, where the response to a target stimulus is reduced by the presence of a high contrast mask (see examples in Figure 1a).

Several studies have demonstrated that these different types of suppression have distinct characteristics, and may occur at different stages in the early visual pathway.

For example, suppression from an overlaid mask shown to the same eye as a target is immune to adaptation [3,4], occurs at temporal frequencies above the range at which cortical neurons respond [4–7], and therefore appears consistent with a pre-cortical locus [4,6]. If a mask is presented dichoptically (to the opposite eye from the target), suppression can be reduced by adaptation [3,6,7], has a temporal profile consistent with cortical neurons [6,7], and is reduced by applying bicuculline (a compound that blocks the suppressive neurotransmitter GABA) to early visual cortex [7]. This points to a cortical locus for interocular suppression. Finally, surround masks have tighter tuning than overlaid masks and are most effective in the periphery [8], can be adapted [9], and (in V1) cause suppression via feedback from higher visual areas [10]. Additionally, some studies have linked the magnitude of surround suppression with endogenous levels of GABA in early visual cortex [11,12], again pointing to a cortical locus.

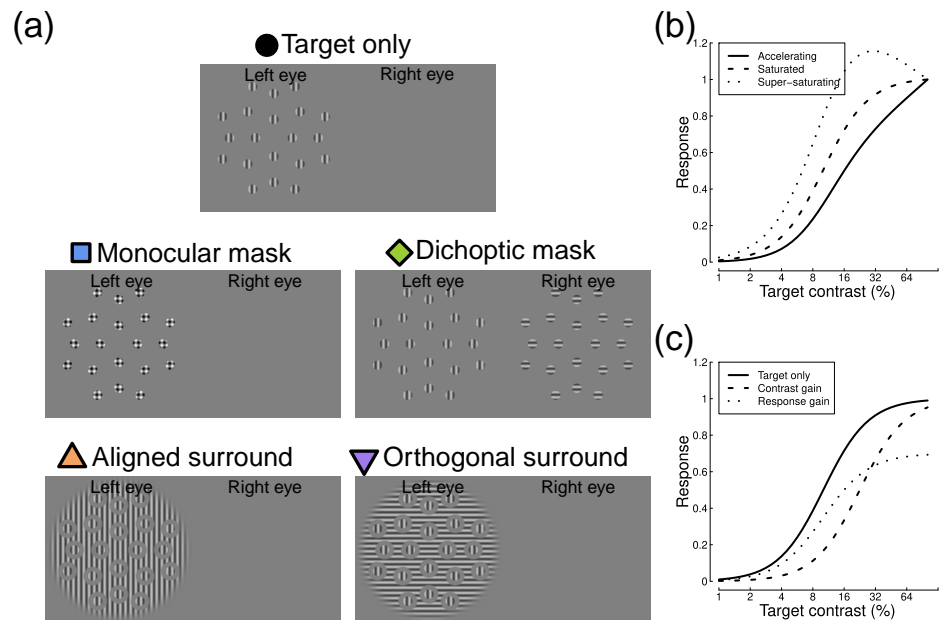

**Fig 1. Example stimuli and illustration of contrast response functions.** Panel (a) shows five stimulus arrangements, illustrating how a vertical target pattern can be combined with four different mask types. Panel (b) shows three varieties of contrast response function, that either continue to accelerate (solid line), saturate (dashed line) or super-saturate (dotted line) across the range of displayable stimulus contrasts. Panel (c) illustrates a contrast gain (dashed line) and a response gain (dotted line) shift, relative to a baseline response (solid line).

An important distinction concerns whether a suppressive effect modulates the contrast gain or the response gain of a neuron (or neural population). Changes in contrast gain shift the stimulus-response curve (the contrast response function) laterally, whereas changes in response gain scale the function vertically (see examples in Figure 1c). These different patterns may be indicative of specific neurophysiological underpinnings for an effect, and potentially different processes might occur at successive stages of processing. Sengpiel et al. [13] showed that in V1, dichoptic and surround masks primarily affected response gain, whereas overlaid masks affected contrast gain. Other studies have found that spatial attention modulates response gain [14], whereas suppression from overlaid masks is more consistent with contrast gain [15]. Spatial adaptation appears to affect both contrast and response gain in primary visual cortex [16], whereas motion adaptation is mostly attributable to contrast gain in area MT [17]. In addition, there is evidence

that suppression builds up at successive stages of cortical processing, beyond primary visual cortex, and is stronger at later levels in the visual hierarchy [18]. This is especially likely for surround suppression, which might be mediated by higher-level neurons with large receptive fields.

Neural responses can be measured non-invasively using steady-state visual evoked potentials (SSVEPs; [19]) typically recorded in humans using either electroencephalography (EEG) or magnetoencephalography (MEG). By flickering the target stimulus at a fixed frequency, entrained neural oscillations are evoked at the flicker frequency, and also its higher harmonics (integer multiples of the flicker rate). Previous studies have shown that contrast-response functions measured using SSVEP are strongly modulated by overlaid masks [15, 20, 21], dichoptic masks [22, 23], and surround masks [24–26].

We begin by conducting a computational re-analysis of 16 published studies to determine whether each type of suppression is best characterized as a contrast gain or a response gain effect. We then report results from two new SSVEP experiments to directly compare four mask types using a common protocol. This also allowed us to explore changes across different electrode sites and different response frequencies. A secondary aim was to determine whether suppressive signals saturate as a function of contrast. We conducted the main experiment with two different mask contrasts, and analyse the data using a hierarchical Bayesian modelling approach.

## Materials and methods

### Computational meta-analysis

#### Inclusion criteria

Studies were included if they reported steady-state contrast response functions measured in human adults with no known disorders or medical conditions. Responses at 3 or more target contrasts were required to fit the baseline functions. We also required that a mask stimulus was presented in at least one condition. This could either be overlaid, dichoptic (presented to the opposite eye from a monocular target), or surrounding the target. We excluded one study with flanking masks which reported only facilitation [27]. We divided the surround conditions into those where the surround was aligned with (parallel to) the target, and those where it was orthogonal. For the overlay and dichoptic conditions, some studies used gratings and others used noise stimuli. Where multiple masking conditions were reported, we included data at the lowest mask contrast tested, and used data with orthogonal masks in preference to aligned masks (for overlay and dichoptic conditions). In studies where an experimental manipulation was carried out, we used data from the baseline (pre-manipulation) condition. We searched online databases using search terms including *SSVEP*, *steady-state*, *dichoptic*, *surround*, *mask* and *suppression*, and applied the above criteria, resulting in 16 studies for inclusion in the analysis.

#### Analysis and modelling

Contrast response function data were extracted using a computer program (WebPlot-Digitizer [28]) from the figures in each paper. Where necessary, these were converted to signal-to-noise ratios by dividing by the response to a blank screen, or at adjacent frequency bins to the target, or to the lowest target contrast condition. In some cases, results were averaged across different temporal frequency conditions to provide a single data set for each study.

Our primary objective was to understand the relative contributions of contrast gain and response gain to suppression from different mask types. We quantified this using a two-stage modelling approach. At the first stage, we fitted a standard gain control

model [2] with three free parameters to the baseline data using a downhill simplex algorithm. The model is defined as:

$$resp = R_{max} \frac{C^p}{Z + C^2} + 1, \quad (1)$$

where  $C$  is the target contrast. The  $Z$  parameter sets the horizontal position of the response curve,  $p$  governs the function shape (see Figure 1b) from accelerating ( $p > 2$ ) to saturating ( $p = 2$ ) to super-saturating ( $p < 2$ ), and  $R_{max}$  scales the overall height of the function. The additive constant (+1) represents additive noise, and converts the model response to a signal-to-noise ratio (implicitly, we also divide  $resp$  by 1, but this is omitted as it has no effect). We fitted the model independently to each study's baseline data by minimising the root-mean-squared error between model and data.

The second stage of fitting used the parameter estimates from the first stage, and fitted the responses in the presence of a mask using the equation:

$$resp = \frac{R_{max}}{r} \times \frac{C^p}{gZ + C^2} + 1, \quad (2)$$

where the new terms  $r$  and  $g$  are free parameters that govern the extent of response gain and contrast gain, respectively. Values of  $r, g > 1$  indicate suppression, though in principle masks can also cause facilitation ( $r, g < 1$ ). We estimated values of these parameters jointly using the data from all studies (separately for each mask type) in a hierarchical Bayesian model. We defined broad hyperpriors for  $g$  and  $r$  as gamma distributions, with parameters  $\alpha = 1.5, \beta = 0.5$ . These functions peak at  $\frac{\alpha-1}{\beta} = 1$ , so the prior expectation before observing any data is that there is no suppression of either kind. The priors had greater probability mass at values  $> 1$ , reflecting our expectation that one or both parameters would produce suppression, but also extended below 1, ensuring that the model was capable of capturing facilitation where it appeared in the data. Both parameters were constrained to have positive values. Bayesian modelling was implemented in *Stan* [29], based on an example script for hierarchical nonlinear regression accompanying Chapter 17 of ref [30]. We examined how the posterior distribution of each parameter varied with mask type, both for individual studies, and across the whole sample.

## EEG experiments

### Participants

Twelve participants completed each version of the experiment; 3 participants completed both experiments, the remaining 9 were unique to each experiment. All participants had normal or corrected-to-normal vision, and no known visual abnormalities. Participants were briefed on the experimental protocols and purpose, and provided written informed consent. The study was approved by the Department of Psychology Ethics Committee at the University of York.

### Apparatus and stimuli

Stimuli were presented using a ViewPixx 3D display (VPixx Technologies Inc., Quebec, Canada), driven by a Mac Pro computer. The refresh rate was 120 Hz, and we interleaved frames intended for the left and right eyes (60 Hz refresh rate per eye). To enable stereo presentation, the display update was synchronised with a set of NVidia 3D pro active shutter glasses using an infra-red signal. The display had a resolution of  $1920 \times 1280$  pixels, and was viewed from a distance of 57cm, at which one degree of visual angle subtended 36 pixels. To ensure good contrast resolution, the display was run in the

high bit-depth monochrome M16 mode, which provided 16 bits of greyscale resolution. A Minolta LS110 photometer was used to gamma correct the display, which had a maximum luminance of  $102 \text{ cd/m}^2$ .

All stimuli were patches of sinusoidal grating with a spatial frequency of 1 cycle per degree. Target stimuli were randomly oriented on each trial, and windowed by a raised cosine envelope with a width of 2 degrees. There were 20 targets arranged in a symmetrical pattern around a central fixation marker, as shown in Figure 1a. The target eccentricities were 3.6, 7.1, 8.5 and 10.7 degrees from the central fixation. Stimuli were spaced in 90 degree intervals at each radius, or in 45 degree intervals at the largest eccentricity. All target stimuli flickered sinusoidally at 5Hz (on-off flicker), between 0% contrast and their nominal Michelson contrast, which was one of six values (0, 6, 12, 24, 48 and 96%). Percentage Michelson contrast is defined as  $100 \frac{L_{max} - L_{min}}{L_{max} + L_{min}}$ , where  $L$  is luminance. Targets were shown to one eye only, which was chosen randomly on each trial. A binocular fixation marker was created from a cluster of overlaid squares (each 13 arc min wide) with random grey levels, and shown to both eyes to aid binocular fusion. Similar markers were also presented in the four corners of the stimulus region, at a distance of 15.7 degrees from the display centre.

We measured target responses with no mask, and also with four categories of mask stimulus. Monocular masks were shown to the same eye as the targets and in the same locations, but had orthogonal orientation. Dichoptic masks were the same, but shown to the non-target eye. Aligned surround masks were large (28 degrees in diameter) grating patches with the same orientation as the target, and with holes surrounding each target element (and the fixation marker). The holes were 4 degrees in diameter, meaning the gap between target and mask was 1 degree (one cycle of the stimulus waveform). Orthogonal surrounds were the same, but were oriented at 90 degrees relative to the targets. Both surround masks were presented to the target eye. There were two principal mask contrasts that were used in the two versions of the experiment: 12% and 24%. We also tested several additional mask contrasts (6, 48 and 96% contrast) at a single target contrast of 24%. The masks drifted at a speed of 6 deg/sec so that the phase alignment between mask and target changed over time [26]. Note that drifting gratings do not produce a steady-state signal, so we did not record responses to the mask stimuli. In addition, for some of the monocular mask conditions, the highest target contrast was reduced from 96% to 88% or 68% contrast to avoid clipping artifacts caused by overlaying the target and mask.

EEG activity was recorded using a 64-channel ANT Neuroscan system sampling at 1 kHz. Participants wore Waveguard caps, with electrodes organised according to the 10/20 system. The ground was located at position *AFz*, and each channel was referenced to the whole-head average. Electrode impedance was maintained at or below 5 k $\Omega$  throughout the experiment. Digital parallel triggers were sent from the ViewPixx display to the EEG amplifier, and recorded the onset of each trial on the EEG trace. Data were amplified, digitised, and saved to disc for offline analysis.

## Procedure

After providing consent, participants were set up with an EEG cap of appropriate size. They then completed six blocks, each comprising a full repetition of the experiment. Blocks lasted around 10 minutes, with the opportunity to take breaks between blocks. Within each block, all 42 conditions were repeated once in a randomized order. Trials lasted 11 seconds, with an inter-trial interval of 3 seconds. Participants were asked to monitor the central fixation and, as far as possible, to minimise blinking when a stimulus was displayed. To maintain attention, the central fixation marker was changed occasionally by re-randomizing the positions and luminances of the squares. There was a 50% chance of this happening on each trial. Participants were asked to count the

number of times the fixation marker changed, and report this at the end of the block. 178

## Data analysis and modelling 179

All data were converted from the native ANT-EEProbe format to a compressed comma-separated value (csv) text file using a custom *Matlab* script and components of the EEGlab toolbox [31]. The data for each participant were then loaded into *R* for analysis. A ten-second waveform for each trial at each electrode was extracted, omitting the first one second after stimulus onset to avoid transients. The fast Fourier transform was calculated for each waveform, and the spectrum stored in a matrix. All repetitions of each condition were then coherently averaged (i.e. taking both the phase and amplitude into account), before being converted to a signal-to-noise ratio by dividing the amplitude at each frequency by the mean amplitude of the neighbouring 10 bins ( $\pm 0.5$  Hz in steps of 0.1 Hz). The signal-to-noise ratio at the target flicker frequency (5 Hz) and its second harmonic (10 Hz) were then used as dependent variables for further analysis. 180  
181  
182  
183  
184  
185  
186  
187  
188  
189  
190

We modelled the data using a two-stage Bayesian hierarchical model similar to that described above for the computational meta-analysis. Here, participant was the unit of observation instead of study. The other main difference was that we also used a hierarchical model (instead of simplex fitting) at the first stage to fit the parameters of the baseline contrast response function ( $Z$ ,  $p$  and  $R_{max}$ ). This seemed appropriate for our novel data set, given that all participants viewed the same stimuli, whereas in the computational meta-analysis different studies had different stimulus parameters. The hyperpriors for each parameter were normal distributions with parameters:  $\mu = 100$ ,  $\sigma = 40$  ( $Z$ );  $\mu = 2$ ,  $\sigma = 0.25$  ( $p$ ); and  $\mu = 5$ ,  $\sigma = 2$  ( $R_{max}$ ). All parameters were constrained to have positive values. Again, we were most interested in the posterior distributions of the suppression parameters ( $r$  and  $g$ ), and explored how these varied by mask type, electrode position, and response frequency. 191  
192  
193  
194  
195  
196  
197  
198  
199  
200  
201  
202

## Data and script availability 203

All data and scripts are publicly available at: <https://dx.doi.org/10.17605/OSF.IO/E62WU> 204

## Results 205

### Previous studies do not sufficiently distinguish contrast vs response gain 206 207

We began by conducting a computational meta-analysis of 16 SSVEP studies from the literature [15, 20–25, 32–40]. Study-specific information is given in Table 1 and the results are shown in Figure 2. For each study, we replot the contrast response functions for the target alone (black points), and with the mask present (coloured points), along with model fits (curves). The model described the data well. The kernel density functions show posterior distributions of parameter estimates for the response gain parameter ( $r$ , grey distributions), and the contrast gain parameter ( $g$ , coloured distributions). For each mask type, the vertical dashed line indicates no suppression (a weight of 1). The 95% highest density intervals are given by the horizontal bars - where these overlap 1 we lack credible evidence for that type of suppression. 208  
209  
210  
211  
212  
213  
214  
215  
216  
217

For individual studies, we see credible evidence for both contrast gain (9 data sets) and response gain (4 data sets). This is most consistent for the overlay masks, which are generally well explained by contrast gain control. However, the 95% highest density interval of the group posterior distribution for contrast gain control, shown in the final row, overlapped with 1. This indicates that we do not have credible evidence for a 218  
219  
220  
221  
222

**Table 1.** Table summarising methodological details for each study in the meta analysis. N: number of participants, SI: saturation index.

| Study                | Method | N  | Target            | TF (Hz)  | Mask                            | Location              | SI    |
|----------------------|--------|----|-------------------|----------|---------------------------------|-----------------------|-------|
| Baker (2014) [20]    | EEG    | 6  | 1 c/deg grating   | 7        | Orthogonal overlay              | Oz, POz               | 0.22  |
| Burr (1987) [33]     | EEG    | 1  | 2 c/deg grating   | 7.8      | Orthogonal overlay              | Oz                    | -0.44 |
| Busse (2009) [21]    | EEG    | 5  | 1 c/deg grating   | 4.5      | Orthogonal overlay              | V1 (source localised) | 0.09  |
| Candy (2001) [34]    | EEG    | 8  | 1 c/deg grating   | 3.3, 5.5 | Orthogonal overlay              | Oz, O1, O2            | 0.31  |
| Pei (2017) [36]      | EEG    | 10 | Binary noise      | 5.14     | Noise overlay                   | Oz                    | -0.03 |
| Ross (1991) [37]     | EEG    | 1  | 2 c/deg grating   | 8.8      | Orthogonal overlay              | Oz                    | -0.04 |
| Smith (2017) [38]    | EEG    | 28 | 0.5 c/deg grating | 7        | Orthogonal overlay              | Oz, POz, O1, O2       | 0.35  |
| Tsai (2012 [15])     | EEG    | 10 | Binary noise      | 5.14     | Noise overlay                   | V1 (source localised) | -0.13 |
| Baker (2015) [32]    | EEG    | 5  | Binary noise      | 10       | Dichoptic                       | Oz, POz               | 0.27  |
| Baker (2017) [22]    | EEG    | 12 | 1 c/deg grating   | 5        | Dichoptic                       | Oz, POz               | 0.04  |
| Chadnova (2018) [23] | MEG    | 5  | Binary noise      | 4        | Dichoptic                       | V1 (source localised) | 0.33  |
| Hou (2020) [35]      | EEG    | 15 | 2 c/deg grating   | 8.5      | Dichoptic                       | V1 (source localised) | 0.09  |
| Zhou (2015) [40]     | EEG    | 12 | Binary noise      | 10       | Dichoptic                       | Oz                    | 0.22  |
| Benjamin (2018) [24] | EEG    | 13 | 2 c/deg grating   | 7        | Aligned and Orthogonal Surround | Oz                    | -0.01 |
| Vanegas (2015) [25]  | EEG    | 21 | 1 c/deg grating   | 25       | Aligned and Orthogonal Surround | POz                   | 0.38  |
| Vanegas (2019) [39]  | EEG    | 11 | 1 c/deg grating   | 25       | Aligned Surround                | Pz, POz, Oz           | 0.49  |

contrast gain effect for overlay suppression. The other three mask types had a similar outcome, as the 95% highest density intervals of the group posterior distributions for both parameters all overlap 1. This suggests that overall the literature does not give a consistent picture of whether response gain or contrast gain is responsible for different types of suppression (though the parameter values for contrast gain are somewhat higher on average). This could be for any number of reasons, but is likely to be partly due to the methodological heterogeneity across studies (see Table 1). To address this shortcoming, we conducted a new study in which participants viewed stimuli involving all four types of mask.

223  
224  
225  
226  
227  
228  
229  
230  
231

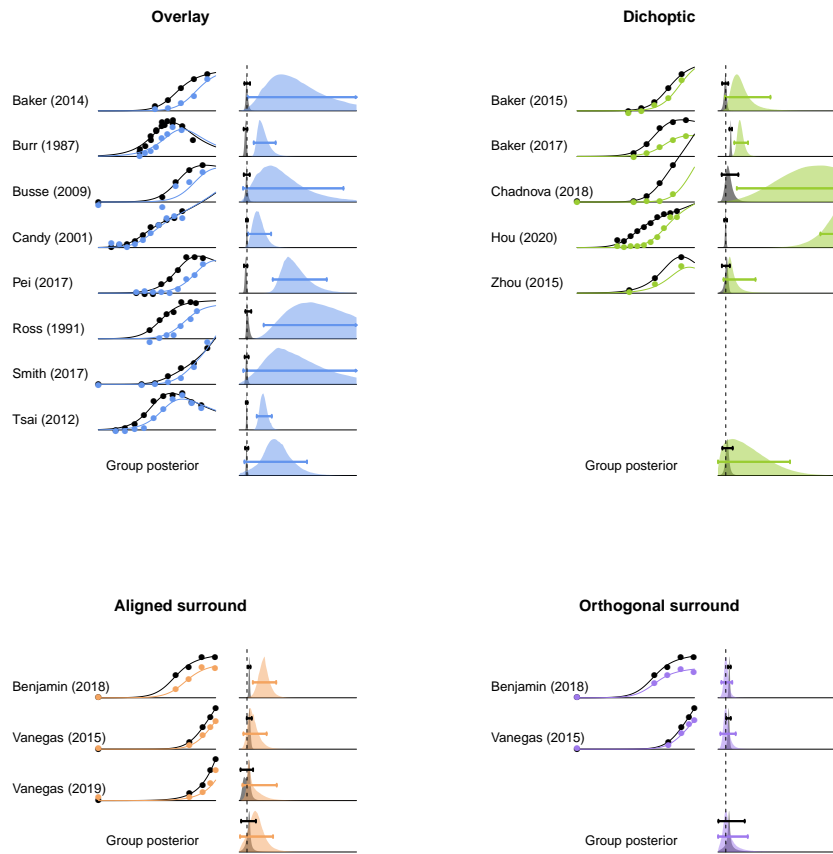

**Fig 2. Computational meta-analysis of 16 studies from the literature reporting SSVEP measures of suppression.** Each study is referred to by the first author surname - see text for full citations. Contrast response functions at baseline (black points) and with a mask present (coloured points) were fit using a two stage modelling procedure (curves). The posterior distributions (vertically rescaled for visibility) of parameter estimates for response gain (grey) and contrast gain (colours) are shown for each study and the group estimates. Vertical dashed lines indicate a parameter value of 1 (the axis extends to  $x = 15$ ). Horizontal bars give the 95 percent highest density intervals for each parameter estimate.



## Suppression is due to contrast gain at the first harmonic for all mask types

In our empirical experiments, the target stimulus evoked strong steady-state responses at both the first harmonic frequency (5 Hz) and the second harmonic frequency (10 Hz). Figure 3a shows the averaged Fourier spectrum from the baseline (no mask) condition with 96% target contrast. Responses at both frequencies were strongest at the occipital pole, over early visual cortex (see inset scalp plots). At most electrodes, responses increased monotonically as a function of contrast (see examples in Figure 3b,c). In general, responses at the first harmonic (5Hz) were more likely to accelerate, and those at the second harmonic more likely to saturate or super-saturate. The scalp plot insets to Figures 3b,c summarise this using a saturation index proposed by Ledgeway et al. [41]. It is calculated by taking the difference between the responses at the highest two contrasts (96% and 48%), and dividing by the maximum response. Values of  $SI > 1$  correspond to acceleration (plotted violet),  $SI = 1$  to saturation (white), and  $SI < 1$  to super-saturation (green). Notice that overall the first harmonic responses accelerate (median  $SI = 0.10$ ), but that many of the second harmonic responses saturate or super-saturate (median  $SI = 0.01$ ).

To quantify how suppression varied across the scalp, and across different mask types and response frequencies, we fitted a hierarchical Bayesian model to the data. The first stage of this process involved estimating values for the three free parameters in equation (1). Figure 4a shows an example fit at electrode *Oz* for the low contrast mask experiment. The thick black line gives the fit using the posterior mean parameter estimates ( $p = 1.94$ ,  $Z = 134.35$ ,  $R_{max} = 4.8$ ), and thin lines show predictions for 100 randomly sampled posterior parameter combinations. At the second stage of fitting, we estimated values of the suppressive parameters  $g$  and  $r$  for each mask type. Example fits are shown in Figure 4b-e, with accompanying posterior distributions of parameter estimates in panels g-j. Note that the parameters are estimated individually for each participant, and the plots in Figure 4 show group level parameters, which do not necessarily correspond to the average data as well as an optimal least-squares fit. We assess whether a parameter makes a credible contribution to the response by determining whether the 95% highest density interval of the posterior (shown by the black bars at the margins of Figure 4g-j) exceeds 1. For all four examples shown in Figure 4g-j, the contrast gain parameter ( $g$ , y-axis) was credibly greater than 1, whereas the response gain parameter ( $r$ , x-axis) was not credibly different from 1. This is evidence that all four mask types modulate responses via contrast gain control at electrode *Oz*, for the first harmonic response.

## Suppression across electrode and scalp location

We repeated the above analysis independently at each electrode, for each response frequency (5 Hz and 10 Hz), and for both experiments (12% and 24% mask contrast). Figure 5 summarises the results for the 12% mask contrast experiment, and for each mask type. For the first harmonic (5 Hz) response (top two rows), there were strong contrast gain control effects (panels a-d), but little credible effect of response gain (panels e-h). For the second harmonic response (10 Hz), although some contrast gain effects were credible at the occipital pole (electrode *Oz* for all mask types, panels i-l), suppression was also well described by response gain (panels m-p). Example contrast response functions and posterior distributions at the second harmonic are shown in Figure 6. This overall pattern was replicated in our second data set with higher (24%) contrast masks (Figure 7).

Closer inspection of these results reveals some interesting subtleties and differences across mask conditions. Note in particular that the weights for surround suppression at the first harmonic are generally weaker at the occipital pole (electrodes *Oz* and

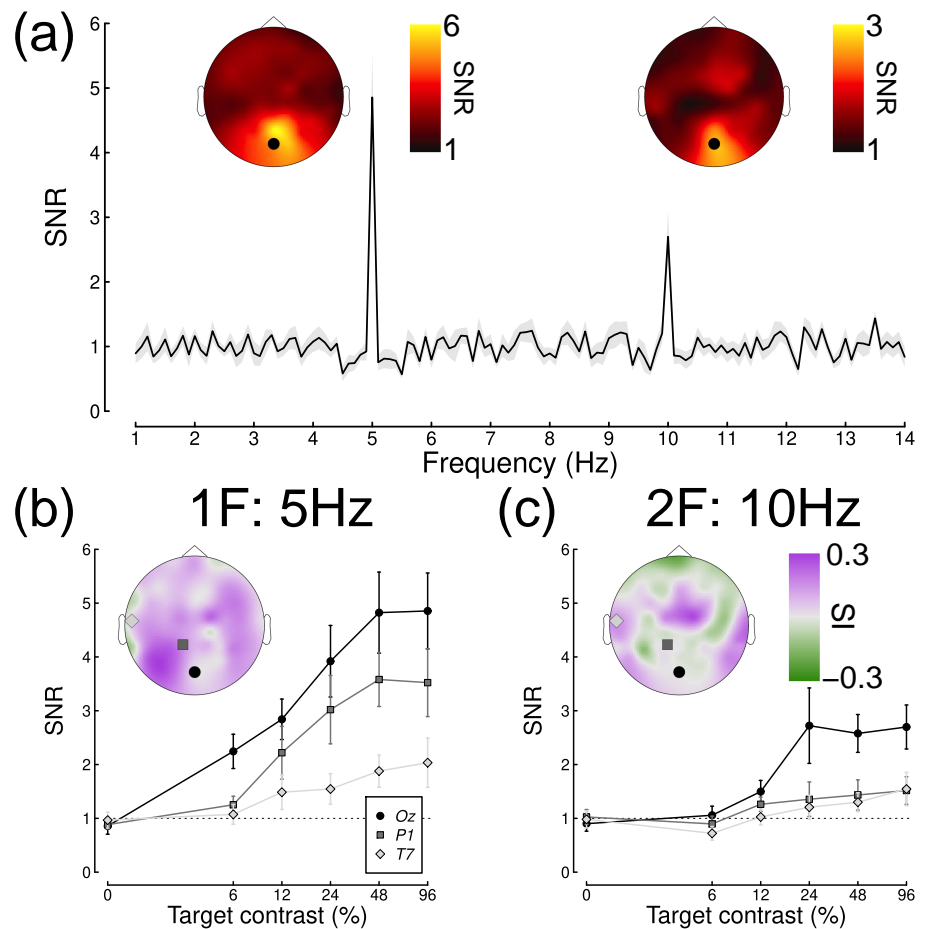

**Fig 3. Averaged Fourier spectrum and example contrast response functions.**

Panel (a) shows the spectrum for a high contrast target, with inset scalp plots showing SNRs at the first and second harmonic frequencies. The spectrum is taken from electrode *Oz*, indicated by the black points in the scalp plots. The shaded region and error bars indicate  $\pm 1$  standard error. Panels (b) and (c) show example contrast response functions at the first and second harmonics at electrodes *Oz*, *P1* and *T7*, averaged across participants ( $N=12$ ). The inset scalp plots show how the saturation index varies across the head.

*POz*) than for monocular and dichoptic suppression. But suppressive weights increase at bilateral electrodes over more parietal regions of cortex. For surround suppression, this might reflect increased suppression in extra-striate cortical regions that have larger receptive fields. More generally, it suggests that suppression builds up across successive stages of processing. It also appears that, whereas suppression at the first harmonic is primarily due to contrast gain control, suppression at the second harmonic involves changes in both contrast and response gain (see lower two rows of Figures 5 & 7). This may well reflect the involvement of different classes of neurons - for example, second harmonic responses imply more severe nonlinearities, which might include suppression. This is also consistent with the greater saturation of the second harmonic response (inset to Figure 3c).

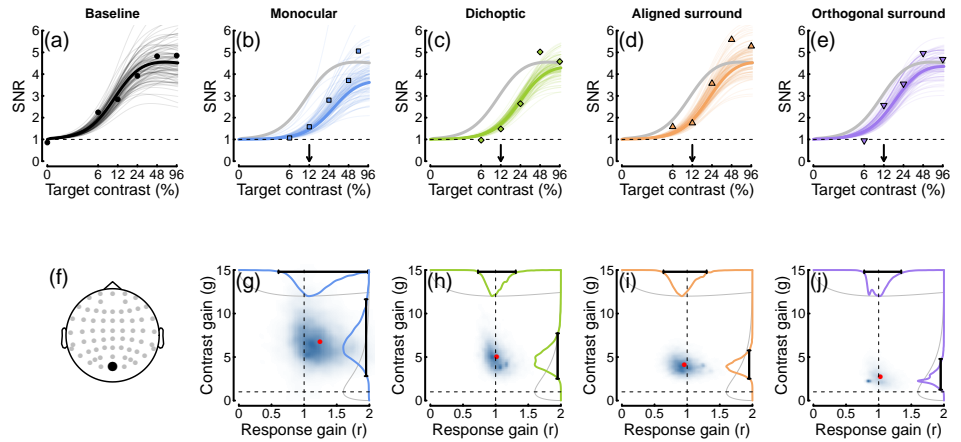

**Fig 4. Contrast response functions from electrode *Oz*, with example model fits and posterior parameter estimates.** Panel (a) shows the data from the baseline (no mask) condition (points), plotted alongside model curves for the posterior mean of parameter estimates (thick curve), and random posterior samples (thin curves). Panels (b-e) show data for four types of mask in the same format (grey curves duplicate the mean fit from panel (a)), with the arrows indicating the mask contrast. Panel (f) shows the electrode location. Panels (g-j) show posterior density estimates for the response gain (x-axis) and contrast gain (y-axis) weight parameters. Red points show the means, dashed lines give the value expected in the case of no effect (a weight of 1), and grey and coloured distributions in the margins show the prior and posterior for each parameter. For all mask types, the contrast gain weight estimate was substantially greater than 1.

### Limited saturation of mask signals

Finally, we asked about the properties of the mask signal. Of particular interest is whether the mask signal itself saturates before suppressing the target. If it does, this implies the presence of a nonlinearity before suppression impacts, as has been shown psychophysically for surround masks [42]. Figure 8a shows model predictions for a linear suppressive signal (black curve), and a saturating suppressive signal (red curve). We therefore measured responses at a fixed (24%) target contrast, for mask contrasts that ranged from 0% to 96%. For this analysis, we pooled data across the two experiments, giving us  $N = 21$  participants (data for the three participants who completed both experiments were averaged to give a single data set for each of those participants). The results for all four mask types are shown in Figure 8b-e. At both the first and second harmonic frequencies, the target response decreased as a function of mask contrast. For the highest contrast monocular and dichoptic masks, this resulted in an almost complete suppression of the target response ( $SNR \sim 1$ ). For the surround masks at the first harmonic there was still a substantial signal even with the highest (96%) contrast masks.

We calculated a modified saturation index that takes into account the inversion of the functions. This was defined as the difference between responses at the highest two mask contrasts (48% - 96%), scaled by the minimum of the function (we adjusted the index for the monocular mask to take into account the slightly lower mask contrast used to avoid clipping). Again, positive values imply acceleration, values of 0 saturation, and negative values supersaturation, but this time applied to the mask signal. At electrode *Oz*, the saturation index was near or below zero for monocular and dichoptic masks at the first harmonic, and surround masks at the second harmonic. Across the scalp (Figure 8f-i), a range of saturation indices were apparent, though the mean index overall

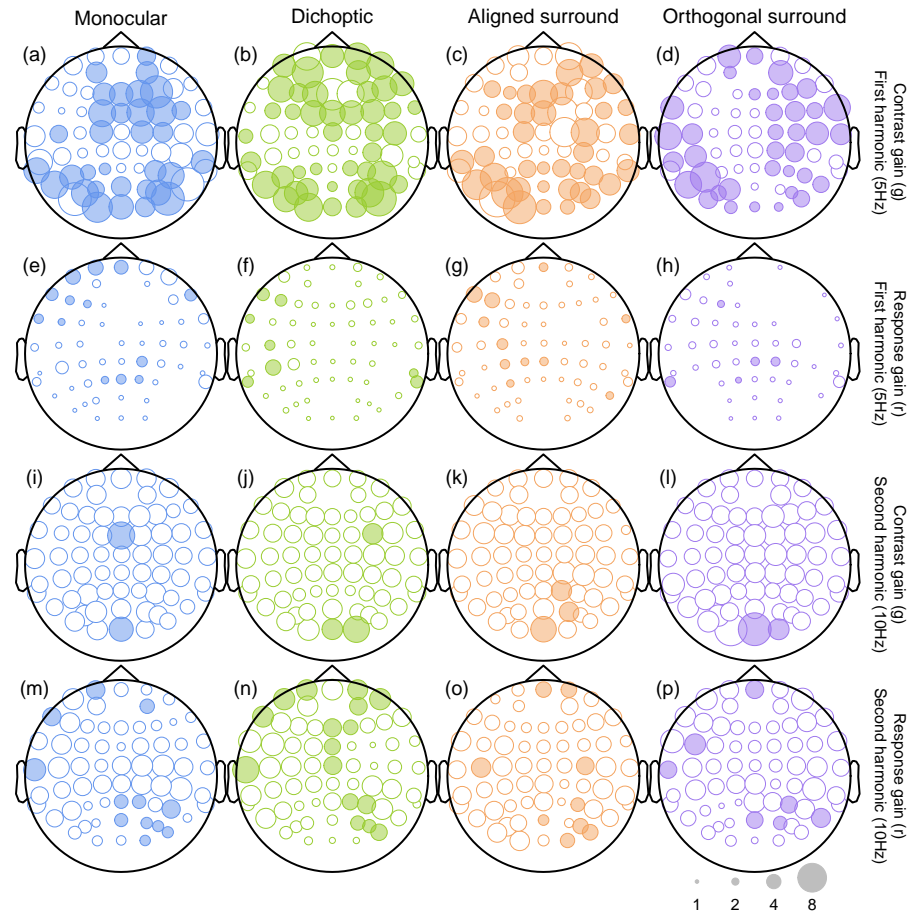

**Fig 5. Scalp plots summarising the suppressive weights for contrast and response gain from the Bayesian hierarchical model, fitted to data from the low mask contrast experiment.** Symbols are filled white when the 95 percent highest density interval of the posterior parameter distribution includes 1 (implying no credible contribution from that type of suppression), and shaded when it exceeds 1 (implying credible evidence for suppression). Larger symbols correspond to stronger suppression (see the scale in lower right corner), but parameters implying facilitation (values < 1) are not plotted.

was positive ( $SI = 0.1$ ).

317

## Discussion

318

We asked whether suppression from four types of mask could be best explained by changes in contrast gain or response gain. A re-analysis of data from 16 studies was inconclusive, most likely due to methodological heterogeneity across studies. Data from two new SSVEP experiments showed that at the first harmonic frequency, all four mask types were best explained by contrast gain control, with minimal influence from response gain. However at the second harmonic frequency, both types of gain control were apparent. There was also evidence that the strength of suppression, particularly from the surround, increased away from the occipital pole. Finally, we asked whether

319

320

321

322

323

324

325

326

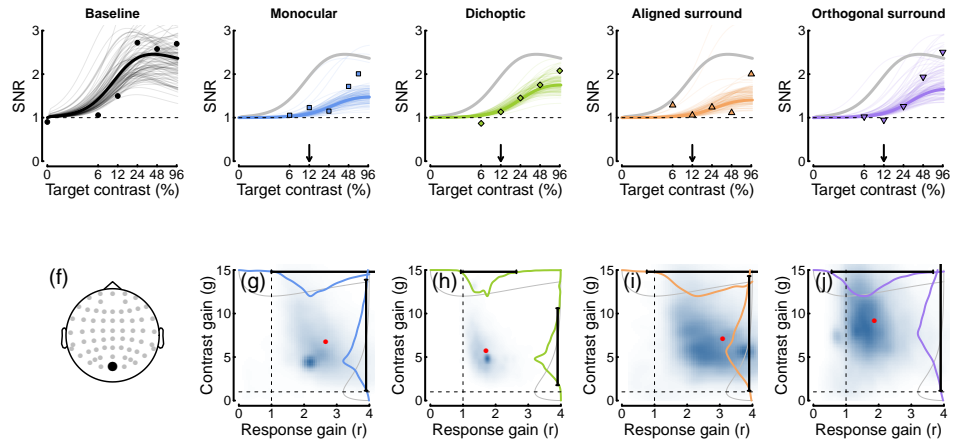

**Fig 6. Contrast response functions at the second harmonic frequency.** Note that the lower SNR at 10 Hz results in noisier data and less precise posterior estimates than at 5 Hz.

327 suppressive signals saturate before impacting the target, and found some evidence of this 328  
 329 for monocular and dichoptic masks at the first harmonic, and surround masks at the 330  
 331 second harmonic. We now discuss whether other experimental paradigms, such as animal 332  
 electrophysiology, magnetic resonance imaging, and psychophysics, provide evidence  
 for contrast or response gain, and consider different hypotheses about the purpose of  
 suppression in the brain.

### Contrast and response gain in other experimental paradigms

333 In single unit electrophysiology studies, overlay masking has long been attributed to 334  
 335 contrast gain control, following the influential work of Heeger [2] (see also [43–45]). 336  
 337 Although subsequent work has questioned whether this suppression arises cortically or 338  
 339 subcortically [4, 46], the data remain consistent with a contrast gain effect. For dichoptic 340  
 341 and surround masks, Sengpiel et al. [13] demonstrated that response gain provided a 342  
 343 better explanation of responses in V1 neurons (see also [6, 47, 48]). However these effects 344  
 345 were layer-dependent, with layer 4 showing response gain effects, and other layers more  
 consistent with contrast gain. Additionally, Sengpiel and Blakemore [47] found strong  
 response gain effects from the abrupt onset of a dichoptic mask, but only when the  
 target was already present at mask onset. This suggests that interocular suppression  
 may comprise multiple mechanisms, consistent with a variety of temporally-dependent  
 perceptual suppression effects associated with binocular rivalry (e.g. [49]).

346 Some studies have used fMRI to investigate different types of suppression, though the 347  
 348 analysis is less straightforward than with SSVEP as it is not possible to tag the target 349  
 350 and mask at different frequencies to dissociate their effects. Moradi and Heeger [50] 351  
 352 measured fMRI responses to gratings with monocular and dichoptic cross-oriented masks. 353  
 354 Their results were well-described by a contrast gain control model, though there are 355  
 356 caveats in the interpretation given that the BOLD signal provides a single measure of  
 the combined response to target and mask stimuli. Zenger-Landolt and Heeger [18]  
 measured surround suppression by carefully locating voxels that responded only to the  
 target location in an independent localiser experiment. Their surround suppression  
 data appear consistent with a response gain change, though they did not fit a model to  
 confirm this.

357 Psychophysical masking studies have traditionally assumed contrast gain effects from

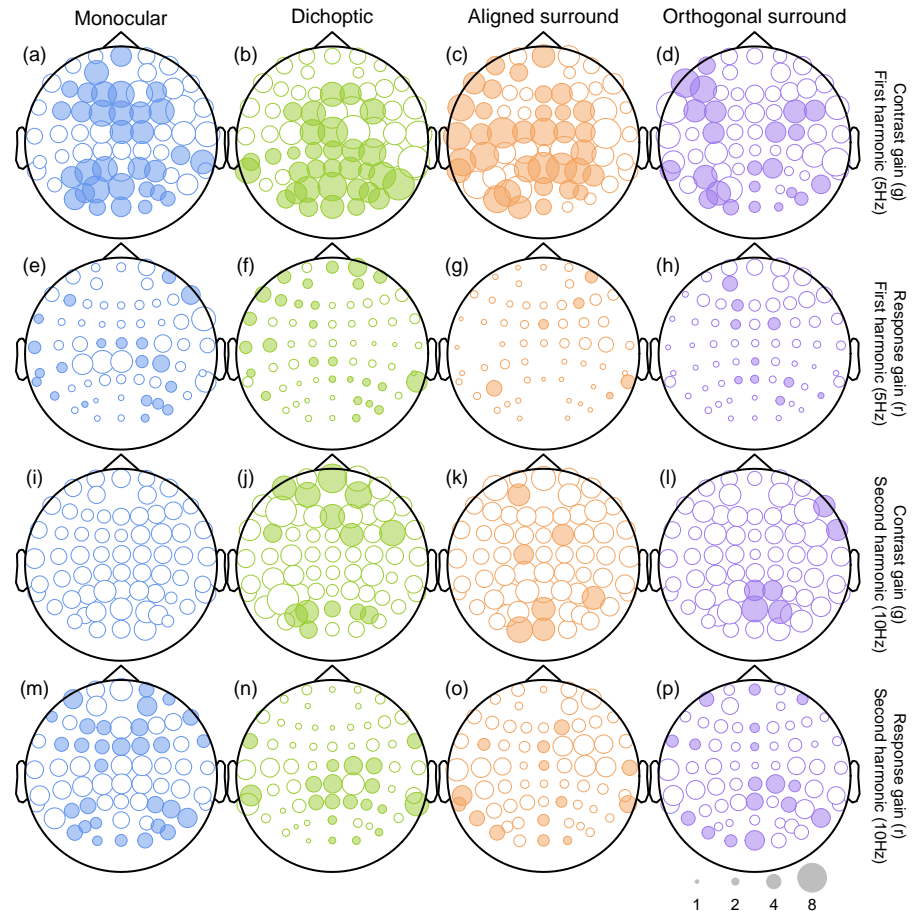

**Fig 7. Scalp plots summarising the suppressive weights for contrast and response gain from the Bayesian hierarchical model, fitted to data from the high mask contrast experiment.** Plotting conventions are as for Figure 5 .

all mask types, following the seminal modelling work of Foley [51]. However, in principle elevation of detection thresholds can also be obtained through a response gain effect, as both manipulations reduce the signal-to-noise ratio and reduce sensitivity. The two effects are difficult to dissociate at detection threshold, but have differential effects above threshold, for example using contrast matching and discrimination paradigms. Some studies have considered model arrangements that are equivalent to response gain effects, notably in the context of surround masking [18, 52] and noise masking paradigms [53]. In surround masking experiments, facilitation effects are sometimes observed, particularly in matching experiments when the central target is of higher contrast than the surround [52, 54, 55], and these can be explained by an increase in response gain. We see some evidence of this in our SSVEP data, where surrounds enhance the response to the highest contrast targets (see Figure 4d). Another interesting result is that of Watanabe et al. [56], who found that during interocular suppression from binocular rivalry, contrast discrimination thresholds are increased. This result (subsequently replicated by [57, 58]) is consistent with a response gain effect, but not a contrast gain effect.

Overall, our SSVEP findings complement other work in the literature on understanding masking effects. Differences between our findings and results from other paradigms

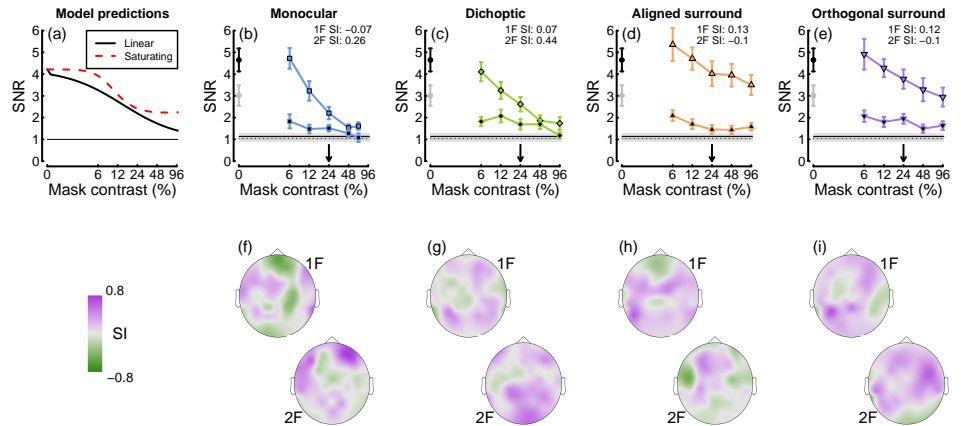

**Fig 8. Summary of the effects of varying mask contrast.** Panel (a) shows the predictions of a gain control model (equation 1) for different levels of mask contrast. In the linear model (black), the suppressive signal is a linear function of mask contrast. In the nonlinear model (red), the suppressive signal has itself passed through a nonlinear transducer function before suppressing the target. Panels (b - e) show empirical data for four mask types, at the first and second harmonic frequencies (black borders and black fills, respectively). Error bars and shaded regions show  $\pm 1$  standard error of the mean across  $N = 21$  participants. Panels (f - i) show how the modified saturation index varies across the scalp.

might be a consequence of SSVEP signals primarily indexing particular classes of neurons [59] or cortical layers [60]. In addition, threshold psychophysics is typically assumed to probe only the most sensitive mechanisms that respond to a target, whereas SSVEP measures the full population response, which may behave differently.

### Why do SSVEP signals sometimes saturate?

Our results include examples of saturation at high target contrasts, particularly at the second harmonic frequency (see Figure 3c). More generally, the studies summarised in Figure 2 show a wide range of behaviours from acceleration (see especially the Chadnova, Smith and Vanegas studies) through to strong supersaturation (see especially the Burr and Tsai studies). Saturation indices for these studies range from -0.44 to 0.49 (see Table 1).

There are several possible explanations for these differences. One possibility is that studies using a sweep-VEP paradigm, in which the stimulus contrast increases during a trial, might suffer from in-trial sequential adaptation effects that cause saturation towards high contrasts. Another explanation concerns the size and spectral content of the stimulus. Large stimuli will be subject to lateral suppression between adjacent areas of the stimulus, via the same mechanism that causes surround suppression. This would be expected to cause saturation at higher contrasts, where suppressive effects are strongest. The same argument holds in the Fourier domain for stimuli that are spectrally broadband, and so stimulate neurons responsive to a range of orientations and spatial frequencies. These neurons will mutually inhibit each other via the overlay masking pathway, again causing saturation. Several studies used large broadband noise textures as stimuli, most notably the study of Tsai et al. [15], which shows some of the strongest supersaturation. Other paradigms use small, spatially local patches of narrowband sine wave grating (e.g. [38]), which instead tend to produce accelerating responses. (Super)saturation may

therefore provide an additional estimate of suppression strength, that could be leveraged in studies investigating group or individual differences in suppression. For discussion of the potential importance of supersaturation in individual neurons, see [61].

## What is suppression for?

There have been many suggestions about the purpose of gain control suppression in the brain. These include reducing redundancy, sharpening tuning, and optimising sensitivity for the current environment (see [1], for further discussion). Recent work has demonstrated that suppression between neurons can be *reweighted* based on recent stimulation history [62]. Specifically, neurons that fire at the same time come to suppress each other more strongly [63]. This is a novel type of adaptation that is quite different from traditional paradigms in which a single stimulus is used as an adaptor. It suggests that gain control processes are dynamic rather than fixed, and can be modulated by past stimulation. Recently, we [22] pointed out that a gain control model of signal combination appears to be implementing statistically optimal combination of noisy signals, and suggested that suppression is the mechanism by which multiple cues are weighted. A prediction that follows from this idea is that the gain control process should be flexible enough to change the extent of suppression between two signals to dynamically suppress noisier inputs. This prediction is consistent with the normalization reweighting idea, because when two stimuli are presented together, the covariance between the neurons they activate will increase, and they should suppress each other more. Normalization reweighting has also been demonstrated psychophysically for both overlaid and surround masks [64], suggesting that this process might operate across multiple suppressive pathways.

## Conclusions

We asked if four types of masking are best explained by contrast gain or response gain effects when measured using steady-state EEG. A computational meta-analysis of 16 existing studies proved inconclusive, so we conducted two new experiments. The results show that overlay, dichoptic and surround masks are all best described by contrast gain effects for responses at the first harmonic. Suppression at the second harmonic involved a combination of contrast and response gain effects. We also found some evidence that suppressive signals saturate before impacting the target, though this was not consistent across mask type and response frequency. Although suppression from different mask types involves distinct anatomical pathways, gain control processes appear to serve a common purpose, which we suggest might be to suppress less reliable inputs.

## Acknowledgements

Supported by the Royal Society (grant number RG130121 to DHB).

## References

1. Carandini M, Heeger DJ. Normalization as a canonical neural computation. *Nat Rev Neurosci.* 2012;13(1):51–62. doi:10.1038/nrn3136.
2. Heeger DJ. Normalization of cell responses in cat striate cortex. *Vis Neurosci.* 1992;9(2):181–97. doi:10.1017/s0952523800009640.



3. Baker DH, Meese TS, Summers RJ. Psychophysical evidence for two routes to suppression before binocular summation of signals in human vision. *Neuroscience*. 2007;146(1):435–48. doi:10.1016/j.neuroscience.2007.01.030.
4. Freeman TCB, Durand S, Kiper DC, Carandini M. Suppression without inhibition in visual cortex. *Neuron*. 2002;35(4):759–71. doi:10.1016/s0896-6273(02)00819-x.
5. Carandini M, Heeger DJ, Senn W. A synaptic explanation of suppression in visual cortex. *J Neurosci*. 2002;22(22):10053–65.
6. Li B, Peterson MR, Thompson JK, Duong T, Freeman RD. Cross-orientation suppression: monoptic and dichoptic mechanisms are different. *J Neurophysiol*. 2005;94(2):1645–50. doi:10.1152/jn.00203.2005.
7. Sengpiel F, Vorobyov V. Intracortical origins of interocular suppression in the visual cortex. *J Neurosci*. 2005;25(27):6394–400. doi:10.1523/JNEUROSCI.0862-05.2005.
8. Petrov Y, Carandini M, McKee S. Two distinct mechanisms of suppression in human vision. *J Neurosci*. 2005;25(38):8704–7. doi:10.1523/JNEUROSCI.2871-05.2005.
9. Webb BS, Dhruv NT, Solomon SG, Tailby C, Lennie P. Early and late mechanisms of surround suppression in striate cortex of macaque. *J Neurosci*. 2005;25(50):11666–75. doi:10.1523/JNEUROSCI.3414-05.2005.
10. Nassi JJ, Lomber SG, Born RT. Corticocortical feedback contributes to surround suppression in V1 of the alert primate. *J Neurosci*. 2013;33(19):8504–17. doi:10.1523/JNEUROSCI.5124-12.2013.
11. Cook E, Hammett ST, Larsson J. GABA predicts visual intelligence. *Neurosci Lett*. 2016;632:50–4. doi:10.1016/j.neulet.2016.07.053.
12. Yoon JH, Maddock RJ, Rokem A, Silver MA, Minzenberg MJ, Ragland JD, et al. GABA concentration is reduced in visual cortex in schizophrenia and correlates with orientation-specific surround suppression. *J Neurosci*. 2010;30(10):3777–81. doi:10.1523/JNEUROSCI.6158-09.2010.
13. Sengpiel F, Baddeley RJ, Freeman TC, Harrad R, Blakemore C. Different mechanisms underlie three inhibitory phenomena in cat area 17. *Vision Res*. 1998;38(14):2067–80. doi:10.1016/s0042-6989(97)00413-6.
14. Itthipuripat S, Sprague TC, Serences JT. Functional MRI and EEG Index Complementary Attentional Modulations. *J Neurosci*. 2019;39(31):6162–6179. doi:10.1523/JNEUROSCI.2519-18.2019.
15. Tsai JJ, Wade AR, Norcia AM. Dynamics of normalization underlying masking in human visual cortex. *J Neurosci*. 2012;32(8):2783–9. doi:10.1523/JNEUROSCI.4485-11.2012.
16. Albrecht DG, Farrar SB, Hamilton DB. Spatial contrast adaptation characteristics of neurones recorded in the cat's visual cortex. *J Physiol*. 1984;347:713–39. doi:10.1113/jphysiol.1984.sp015092.
17. Kohn A, Movshon JA. Neuronal adaptation to visual motion in area MT of the macaque. *Neuron*. 2003;39(4):681–91. doi:10.1016/s0896-6273(03)00438-0.

18. Zenger-Landolt B, Heeger DJ. Response suppression in V1 agrees with psychophysics of surround masking. *J Neurosci*. 2003;23(17):6884–93.
19. Norcia AM, Appelbaum LG, Ales JM, Cottareau BR, Rossion B. The steady-state visual evoked potential in vision research: A review. *J Vis*. 2015;15(6):4. doi:10.1167/15.6.4.
20. Baker DH, Vilidaitė G. Broadband noise masks suppress neural responses to narrowband stimuli. *Front Psychol*. 2014;5:763. doi:10.3389/fpsyg.2014.00763.
21. Busse L, Wade AR, Carandini M. Representation of concurrent stimuli by population activity in visual cortex. *Neuron*. 2009;64(6):931–42. doi:10.1016/j.neuron.2009.11.004.
22. Baker DH, Wade AR. Evidence for an Optimal Algorithm Underlying Signal Combination in Human Visual Cortex. *Cereb Cortex*. 2017;27(1):254–264. doi:10.1093/cercor/bhw395.
23. Chadnova E, Reynaud A, Clavagnier S, Baker DH, Baillet S, Hess RF. Interocular interaction of contrast and luminance signals in human primary visual cortex. *Neuroimage*. 2018;167:23–30. doi:10.1016/j.neuroimage.2017.10.035.
24. Benjamin AV, Wailes-Newson K, Ma-Wyatt A, Baker DH, Wade AR. The Effect of Locomotion on Early Visual Contrast Processing in Humans. *J Neurosci*. 2018;38(12):3050–3059. doi:10.1523/JNEUROSCI.1428-17.2017.
25. Vanegas MI, Blangero A, Kelly SP. Electrophysiological indices of surround suppression in humans. *J Neurophysiol*. 2015;113(4):1100–9. doi:10.1152/jn.00774.2014.
26. Xiao B, Wade AR. Measurements of long-range suppression in human opponent S-cone and achromatic luminance channels. *J Vis*. 2010;10(13):10. doi:10.1167/10.13.10.
27. Polat U, Norcia AM. Neurophysiological evidence for contrast dependent long-range facilitation and suppression in the human visual cortex. *Vision Res*. 1996;36(14):2099–109. doi:10.1016/0042-6989(95)00281-2.
28. Rohatgi A. WebPlotDigitizer: Version 4.4. <https://automeris.io/WebPlotDigitizer>; 2020.
29. Carpenter B, Gelman A, Hoffman MD, Lee D, Goodrich B, Betancourt M, et al. Stan: A Probabilistic Programming Language. *Journal of Statistical Software, Articles*. 2017;76(1):1–32. doi:10.18637/jss.v076.i01.
30. Kruschke JK. *Doing Bayesian data analysis: a tutorial with R, JAGS, and Stan*. 2nd ed. Elsevier, Academic Press; 2014.
31. Delorme A, Makeig S. EEGLAB: an open source toolbox for analysis of single-trial EEG dynamics including independent component analysis. *J Neurosci Methods*. 2004;134(1):9–21. doi:10.1016/j.jneumeth.2003.10.009.
32. Baker DH, Simard M, Saint-Amour D, Hess RF. Steady-state contrast response functions provide a sensitive and objective index of amblyopic deficits. *Invest Ophthalmol Vis Sci*. 2015;56(2):1208–16. doi:10.1167/iovs.14-15611.
33. Burr DC, Morrone MC. Inhibitory interactions in the human vision system revealed in pattern-evoked potentials. *J Physiol*. 1987;389:1–21. doi:10.1113/jphysiol.1987.sp016643.

34. Candy TR, Skoczenski AM, Norcia AM. Normalization models applied to orientation masking in the human infant. *J Neurosci*. 2001;21(12):4530–41.
35. Hou C, Nicholas SC, Verghese P. Contrast Normalization Accounts for Binocular Interactions in Human Striate and Extra-striate Visual Cortex. *J Neurosci*. 2020;40(13):2753–2763. doi:10.1523/JNEUROSCI.2043-19.2020.
36. Pei F, Baldassi S, Tsai JJ, Gerhard HE, Norcia AM. Development of contrast normalization mechanisms during childhood and adolescence. *Vision Res*. 2017;133:12–20. doi:10.1016/j.visres.2016.03.010.
37. Ross J, Speed HD. Contrast adaptation and contrast masking in human vision. *Proc Biol Sci*. 1991;246(1315):61–9. doi:10.1098/rspb.1991.0125.
38. Smith AK, Wade AR, Penkman KEH, Baker DH. Dietary modulation of cortical excitation and inhibition. *J Psychopharmacol*. 2017;31(5):632–637. doi:10.1177/0269881117699613.
39. Vanegas MI, Blangero A, Galvin JE, Di Rocco A, Quartarone A, Ghilardi MF, et al. Altered dynamics of visual contextual interactions in Parkinson’s disease. *NPJ Parkinsons Dis*. 2019;5:13. doi:10.1038/s41531-019-0085-5.
40. Zhou J, Baker DH, Simard M, Saint-Amour D, Hess RF. Short-term monocular patching boosts the patched eye’s response in visual cortex. *Restor Neurol Neurosci*. 2015;33(3):381–7. doi:10.3233/RNN-140472.
41. Ledgeway T, Zhan C, Johnson AP, Song Y, Baker CL Jr. The direction-selective contrast response of area 18 neurons is different for first- and second-order motion. *Vis Neurosci*. 2005;22(1):87–99. doi:10.1017/S0952523805221120.
42. Meese TS, Challinor KL, Summers RJ, Baker DH. Suppression pathways saturate with contrast for parallel surrounds but not for superimposed cross-oriented masks. *Vision Res*. 2009;49(24):2927–35. doi:10.1016/j.visres.2009.09.006.
43. Tolhurst DJ, Heeger DJ. Comparison of contrast-normalization and threshold models of the responses of simple cells in cat striate cortex. *Vis Neurosci*. 1997;14(2):293–309. doi:10.1017/s0952523800011433.
44. Bonds AB. Role of inhibition in the specification of orientation selectivity of cells in the cat striate cortex. *Vis Neurosci*. 1989;2(1):41–55. doi:10.1017/s0952523800004314.
45. Carandini M, Heeger DJ. Summation and division by neurons in primate visual cortex. *Science*. 1994;264(5163):1333–6. doi:10.1126/science.8191289.
46. Li B, Thompson JK, Duong T, Peterson MR, Freeman RD. Origins of cross-orientation suppression in the visual cortex. *J Neurophysiol*. 2006;96(4):1755–64. doi:10.1152/jn.00425.2006.
47. Sengpiel F, Blakemore C. Interocular control of neuronal responsiveness in cat visual cortex. *Nature*. 1994;368(6474):847–50. doi:10.1038/368847a0.
48. Webb BS, Tinsley CJ, Barraclough NE, Parker A, Derrington AM. Gain control from beyond the classical receptive field in primate primary visual cortex. *Vis Neurosci*. 2003;20(3):221–30. doi:10.1017/s0952523803203011.
49. Wolfe JM. Reversing ocular dominance and suppression in a single flash. *Vision Res*. 1984;24(5):471–8. doi:10.1016/0042-6989(84)90044-0.

50. Moradi F, Heeger DJ. Inter-ocular contrast normalization in human visual cortex. *J Vis.* 2009;9(3):13.1–22. doi:10.1167/9.3.13.
51. Foley JM. Human luminance pattern-vision mechanisms: masking experiments require a new model. *J Opt Soc Am A Opt Image Sci Vis.* 1994;11(6):1710–9. doi:10.1364/josaa.11.001710.
52. Xing J, Heeger DJ. Measurement and modeling of center-surround suppression and enhancement. *Vision Res.* 2001;41(5):571–83. doi:10.1016/s0042-6989(00)00270-4.
53. Lu ZL, Doshier BA. External noise distinguishes attention mechanisms. *Vision Res.* 1998;38(9):1183–98. doi:10.1016/s0042-6989(97)00273-3.
54. Cannon MW, Fullenkamp SC. Spatial interactions in apparent contrast: individual differences in enhancement and suppression effects. *Vision Res.* 1993;33(12):1685–95. doi:10.1016/0042-6989(93)90034-t.
55. Snowden RJ, Hammett ST. The effects of surround contrast on contrast thresholds, perceived contrast and contrast discrimination. *Vision Res.* 1998;38(13):1935–45. doi:10.1016/s0042-6989(97)00379-9.
56. Watanabe K, Paik Y, Blake R. Preserved gain control for luminance contrast during binocular rivalry suppression. *Vision Res.* 2004;44(26):3065–71. doi:10.1016/j.visres.2004.07.011.
57. Alais D, Cass J, O’Shea RP, Blake R. Visual sensitivity underlying changes in visual consciousness. *Curr Biol.* 2010;20(15):1362–7. doi:10.1016/j.cub.2010.06.015.
58. Baker DH, Cass JR. A dissociation of performance and awareness during binocular rivalry. *Psychol Sci.* 2013;24(12):2563–8. doi:10.1177/0956797613496824.
59. McKeefry DJ, Russell MH, Murray IJ, Kulikowski JJ. Amplitude and phase variations of harmonic components in human achromatic and chromatic visual evoked potentials. *Vis Neurosci.* 1996;13(4):639–53. doi:10.1017/s095252380008543.
60. Bruyns-Haylett M, Luo J, Kennerley AJ, Harris S, Boorman L, Milne E, et al. The neurogenesis of P1 and N1: A concurrent EEG/LFP study. *Neuroimage.* 2017;146:575–588. doi:10.1016/j.neuroimage.2016.09.034.
61. Peirce JW. The potential importance of saturating and supersaturating contrast response functions in visual cortex. *J Vis.* 2007;7(6):13. doi:10.1167/7.6.13.
62. Westrick ZM, Heeger DJ, Landy MS. Pattern Adaptation and Normalization Reweighting. *J Neurosci.* 2016;36(38):9805–16. doi:10.1523/JNEUROSCI.1067-16.2016.
63. Aschner A, Solomon SG, Landy MS, Heeger DJ, Kohn A. Temporal Contingencies Determine Whether Adaptation Strengthens or Weakens Normalization. *J Neurosci.* 2018;38(47):10129–10142. doi:10.1523/JNEUROSCI.1131-18.2018.
64. Yiltiz H, Heeger DJ, Landy MS. Contingent adaptation in masking and surround suppression. *Vision Res.* 2020;166:72–80. doi:10.1016/j.visres.2019.11.004.
